# Supplementary material for: Effectiveness of adaptive silverware on range of motion of the hand
Source: PeerJ. 2016 Feb 15;4:e1667. doi: 10.7717/peerj.1667 (PMC4756747; doi:10.7717/peerj.1667)
Supplement: Data S1 [file peerj-04-1667-s001.xlsx]

## Sheet: Sheet1
Subject	IndexMCP1A	IndexMCP1B	IndexMCP1C	IndexMCP2A	IndexMCP2B	IndexMCP2C	IMCP3A	IMCP3B	IMCP3C	IPIP1A	IPIP1B	IPIP1C	IPIP2A	IPIP2B	IPIP2C	IPIP3A	IPIP3B	IPIP3C	IDIP1A	IDIP1B	IDIP1C	IDIP2A	IDIP2B	IDIP2C	IDIP3A	IDIP3B	IDIP3C	MiddleMCP1A	MMCP1B	MMCP1C	MMCP2A	MMCP2B	MMCP2C	MMCP3A	MMCP3B	MMCP3C	MPIP1A	MPIP1B	MPIP1C	MPIP2A	MPIP2B	MPIP2C	MPIP3A	MPIP3B	MPIP3C	MDIP1A	MDIP1B	MDIP1C	MDIP2A
1	102	103	104	68	69	70	54	54	56	115	114	112	75	73	73	58	57	58	90	93	90	54	55	54	43	43	42	107	106	106	73	73	71	56	56	56	110	109	109	70	71	70	58	58	57	94	95	96	61
2	111	112	114	80	82	81	64	66	69	116	114	115	74	74	74	57	57	58	64	61	62	58	57	57	39	40	40	113	114	113	89	90	90	75	76	75	107	107	106	71	72	71	56	57	58	81	82	81	65
3	98	100	101	47	47	44	30	30	28	112	113	113	72	74	72	62	59	60	71	72	74	42	43	43	34	35	31	102	99	100	54	55	54	40	41	40	105	103	104	70	68	68	55	55	53	82	82	81	40
4	94	93	93	76	76	78	59	58	59	115	113	114	73	75	74	59	58	58	48	49	49	51	53	51	39	38	38	93	93	91	82	82	80	68	69	70	109	109	110	72	70	71	53	52	52	57	60	58	53
5	87	85	85	48	48	49	41	36	37	116	117	115	70	70	73	51	51	48	63	62	60	46	46	44	47	46	47	97	97	96	57	58	58	46	46	47	104	106	105	66	67	66	54	54	54	82	81	81	46
6	72	72	74	44	43	45	30	29	31	104	103	101	64	62	62	31	34	33	75	73	74	48	50	51	38	40	39	79	82	80	51	52	54	37	36	36	110	110	113	62	62	60	50	50	50	68	66	69	52
7	98	99	99	45	44	45	29	28	31	120	121	120	78	76	76	66	66	64	62	63	64	53	54	54	38	36	36	95	96	96	58	56	57	51	52	51	117	117	117	73	75	74	62	62	61	68	70	68	55
8	79	79	80	60	61	63	43	44	43	99	98	99	71	72	72	67	65	66	53	54	52	36	38	37	33	32	33	83	84	83	68	70	71	55	56	56	97	98	99	58	58	58	51	52	49	60	63	60	43
9	72	72	74	70	69	69	50	50	49	112	114	112	64	68	67	58	59	57	56	56	56	50	49	52	33	34	32	91	90	88	74	72	73	58	59	60	110	109	108	70	68	69	58	57	57	73	68	70	49
10	108	106	106	72	71	72	52	52	53	110	109	109	80	78	79	63	63	62	49	51	49	43	42	40	33	32	34	118	116	118	83	81	83	67	66	66	94	95	94	71	70	68	58	59	60	78	77	78	52
11	98	100	99	54	54	53	30	28	30	97	98	99	65	67	67	49	48	49	93	91	90	60	59	59	50	51	51	99	98	97	59	63	61	38	37	37	98	100	99	66	64	64	44	47	47	90	93	91	60
12	82	80	80	63	65	64	47	46	48	97	99	102	55	57	58	46	45	46	50	52	51	34	36	36	26	30	30	93	89	90	76	75	75	66	66	66	103	103	99	56	55	55	44	45	45	45	50	45	38
13	82	81	82	58	60	61	41	42	43	85	83	83	76	74	74	59	61	59	60	61	65	50	51	49	37	35	36	94	94	92	70	71	69	48	50	48	108	104	105	77	79	78	63	62	63	61	63	60	46
14	82	79	80	59	60	60	47	47	48	104	104	104	65	64	64	57	58	57	61	63	61	46	47	43	39	37	35	94	92	92	71	70	71	65	63	64	94	97	96	60	59	58	55	55	55	66	64	63	47
15	65	66	67	48	49	48	51	50	51	106	107	106	81	78	79	63	63	64	66	68	66	47	46	40	33	34	33	68	68	69	55	54	54	59	57	59	106	105	103	78	80	77	64	63	63	64	62	65	49
16	100	99	100	45	49	45	37	35	36	107	107	107	69	69	69	49	52	52	72	74	71	47	44	45	24	25	24	99	100	99	56	58	58	50	53	53	109	104	104	67	65	65	47	48	47	71	71	71	53
17	99	96	96	70	74	72	45	47	46	95	96	97	74	74	74	57	59	58	53	53	54	31	30	30	33	31	35	99	101	100	86	84	82	63	64	63	99	98	98	67	67	66	51	52	52	62	58	59	43
18	83	80	82	29	31	30	26	29	27	104	105	104	75	76	75	54	55	55	68	66	65	45	46	46	21	19	23	85	85	84	37	36	36	27	27	27	101	101	101	75	72	72	57	57	59	77	78	77	51
19	82	82	82	72	73	73	56	55	52	106	105	107	66	66	66	55	54	52	53	57	51	45	45	43	38	39	39	95	95	95	82	81	82	68	65	64	108	109	108	65	62	62	55	55	54	55	53	54	56
20	62	63	63	32	31	29	20	22	20	101	101	102	56	56	56	37	38	36	49	48	47	37	40	38	23	22	22	79	79	78	38	36	38	31	32	32	91	92	91	60	60	61	48	45	48	62	63	62	46
21	90	89	92	58	56	56	39	40	39	111	112	111	67	68	66	52	52	51	65	63	61	42	41	39	31	30	30	89	91	91	61	62	60	50	52	50	108	108	107	64	64	63	46	47	48	74	73	74	44
22	101	103	102	70	72	71	45	45	45	110	108	109	74	72	73	59	59	58	83	84	83	49	49	47	34	33	33	106	104	104	86	85	87	57	57	57	112	112	112	76	75	74	60	59	58	82	80	82	57
23	105	102	103	66	64	66	29	33	31	103	101	100	76	77	77	60	59	58	63	64	60	36	36	34	29	30	29	105	107	104	75	76	74	46	47	47	104	105	104	66	68	67	51	51	51	71	72	73	47
24	93	93	92	58	60	60	48	50	47	110	107	107	75	74	72	50	48	48	60	61	58	36	37	37	35	35	36	100	98	98	69	67	68	56	56	57	109	106	110	68	68	66	52	52	52	68	68	67	49
25	78	78	78	44	44	45	33	32	34	108	109	109	74	73	73	56	55	55	76	75	76	47	46	47	48	48	48	88	89	87	66	66	68	53	53	53	101	102	101	71	69	69	54	53	53	69	68	69	52
26	94	96	96	62	63	65	27	26	26	104	106	104	66	67	67	52	53	53	41	41	38	56	56	56	46	46	46	88	89	89	74	74	72	41	41	42	105	106	106	64	62	61	54	54	55	82	81	80	57
27	99	100	99	75	75	74	49	48	50	114	116	117	75	76	76	64	66	64	72	72	72	53	51	49	47	46	45	103	101	102	84	84	82	65	66	64	110	110	108	67	67	68	58	57	57	90	89	88	72
28	74	76	75	40	42	41	27	28	28	95	98	98	61	60	61	44	43	43	66	69	65	50	50	51	42	41	43	84	84	84	59	60	60	43	42	41	102	102	100	61	61	62	47	48	46	60	61	59	54
29	77	80	80	53	55	53	39	41	41	118	117	117	78	78	78	59	60	59	63	60	62	48	46	46	34	34	33	91	88	88	58	60	58	41	39	41	109	108	108	73	72	72	57	56	57	77	78	77	47
30	76	76	78	62	62	59	48	48	48	99	100	102	60	61	60	40	40	42	67	66	67	48	48	48	33	33	37	87	87	88	71	74	73	63	61	63	103	102	103	59	60	62	49	48	48	79	78	78	59
31	82	79	80	41	41	42	20	21	22	109	108	106	79	81	80	63	63	63	59	59	59	50	49	47	34	33	34	94	95	95	63	63	63	41	41	43	106	104	104	75	76	78	58	58	59	55	55	56	48
32	79	81	79	39	39	41	21	25	22	98	97	99	74	75	76	65	67	64	69	71	68	43	41	41	31	31	32	77	80	77	55	55	54	38	37	39	97	98	97	61	63	62	52	53	52	76	77	76	45
33	75	77	78	50	50	52	41	43	42	116	114	116	73	74	74	59	61	60	65	65	64	49	49	48	37	38	37	95	95	95	78	79	79	69	69	69	108	108	108	68	68	67	54	56	56	79	78	77	54
34	89	91	93	67	65	67	57	57	58	109	109	108	68	68	67	49	51	52	60	60	59	38	39	39	30	28	30	104	102	102	74	74	74	70	68	67	107	108	109	66	65	65	49	50	48	72	70	72	43
AVG	87.2941	87.2941	87.8235	56.6176	57.1765	57.1471	40.4412	40.7353	40.8824	106.618	106.559	106.588	70.6765	70.7941	70.7059	55	55.2647	54.7647	63.6765	64.0294	63.0294	46.1176	46.1471	45.3235	35.6471	35.4412	35.6765	93.9412	93.7647	93.2647	67.4118	67.5294	67.3235	52.9706	52.9412	53.0294	104.735	104.559	104.294	67.4412	67.1176	66.7353	53.6471	53.7353	53.6471	71.4706	71.3824	71.0882	50.9706
[truncated: 81 more columns]
